# Supplementary material for: Consolidating soil carbon turnover models by improved estimates of belowground carbon input
Source: PubMed Central journal article supplement (PMC5007648; doi:10.1038/srep32568), 2016-09-01
Supplement: srep32568-s1.pdf [file srep32568-s1.pdf]

# Consolidating soil carbon turnover models by improved estimates of belowground carbon input

Arezoo Taghizadeh-Toosi<sup>1,\*</sup>, Bent T. Christensen<sup>1</sup>, Margaret Glendining<sup>2</sup> & Jørgen E. Olesen<sup>1</sup>

<sup>1</sup>Aarhus University, Department of Agroecology, AU-Foulum, DK-8830 Tjele, Denmark

<sup>2</sup>Rothamsted Research, Department of Computational and Systems Biology, West Common, Harpenden, Herts AL5 2JQ, UK

\*Corresponding author: Arezoo.Taghizadeh-Toosi@agro.au.dk

## Supplementary online material

### *C-TOOL allometric equation*

Allometric equations to calculate C inputs into the soil is described in Taghizadeh-Toosi *et al.* (2014) as part of the C-TOOL model and Keel *et al.* (2016). The amount of C ( $C_P$ ) in dry matter yield ( $Y_{DM}$ ) of the grain and straw is calculated as Equation 1, CC is a C concentration of  $0.45 \text{ g g}^{-1}$  in all crop parts:

$$C_P = Y_{DM} CC \quad \text{Equation 1}$$

The aboveground carbon in crop residues ( $C_S$ ) depends on winter wheat harvest index (HI = the ratio of grain to total aboveground biomass = 0.45) and is calculated as:

$$C_S = C_P / HI \quad \text{Equation 2}$$

The amount of aboveground residues left after harvesting grain and straw ( $C_L$ ) is calculated as the difference between  $C_S$  and  $C_P$  (grain & straw).

$$C_L = C_S - C_{p(\text{grain})} - C_{p(\text{straw})}$$

22 Belowground C input from roots and rhizodeposition  $C_{iRE}$  is calculated as:

$$23 \quad C_{iRE} = C_S / ((1 - F_{RE}) - C_S) \quad \text{Equation 3}$$

24 where  $F_{RE}$  root and rhizodeposition C (belowground C) as proportion of total C assimilation ( $F_{RE} =$   
25 0.25 for winter wheat).

26 The C-TOOL model has a topsoil (0-25cm) and a subsoil layer (25-100cm) to which C inputs are  
27 distributed as follows:

$$28 \quad C_{top} = C_L + F_{top} C_{iRE} \quad \text{Equation 4}$$

$$29 \quad C_{sub} = (1 - F_{top}) C_{iRE} \quad \text{Equation 5}$$

30  $F_{top}$  is the proportion of belowground C deposited in the topsoil and is set to 0.7 for winter wheat.

### 31 ***Measurement of SOC in the Broadbalk experiment***

32 SOC was calculated from measured % SOC and a standard soil weight of  $2.88 \times 10^6 \text{ kg ha}^{-1}$  0-23cm. The  
33 1843 value was estimated, and the 1865 value calculated from total soil N content in 1865 and C:N ratio in 1893.  
34 SOC measurements started in 1881, as total soil C minus  $\text{CaCO}_3\text{-C}$ , with analysis of air-dried finely ground  
35 (0.354mm) soil. Samples were taken from the whole experiment up to 1966, then from the continuous wheat  
36 sections (sections 1, 6 and 9) only. Samples from 1881, 1893, 1914, 1936 and 1944 were re-analysed in  
37 2001 – 4 for total C by combustion (LECO) and for  $\text{CaCO}_3\text{-C}$  by manometry; this method was also  
38 used for samples from 1992 onwards. For further details, refer to <http://www.era.rothamsted.ac.uk/>  
39 Broadbalk Soil Organic Carbon Open Access data.

40 **References**

41 Taghizadeh-Toosi, A. *et al.* C-TOOL: A simple model for simulating whole-profile carbon storage in  
42 temperate agricultural soils. *Ecological Modelling* **292**, 11-25 (2014b).

43 Keel, S. G. *et al.* Large uncertainty in soil carbon modelling related to carbon input calculation method.  
44 Accepted in *European Journal of Soil Science* (2016).

45  
46  
47

48

49

50

51

52

53

54

55

56

57 **Table S1.** Average measured and simulated SOC contents in 0 – 23 cm using three methods of root C  
 58 input calculations from 1987 to 2010.

|                                                                                                              | N <sub>0</sub> | N <sub>3</sub> | N <sub>4</sub> | N <sub>5</sub> | N <sub>6</sub> |
|--------------------------------------------------------------------------------------------------------------|----------------|----------------|----------------|----------------|----------------|
| Average measured SOC contents 1987-2010<br>(t C ha <sup>-1</sup> )                                           | 25.73          | 31.01          | 31.78          | 31.30          | 32.59          |
| Average simulated SOC (t C ha <sup>-1</sup> ) contents 1987-2010<br>Allometric root C calculations           | 22.22          | 33.02          | 33.25          | 33.38          | 33.43          |
| Average simulated SOC (t C ha <sup>-1</sup> ) contents 1987-2010<br>N <sub>3</sub> root C input calculations | 27.27          | 33.04          | 33.10          | 33.16          | 33.00          |
| Average simulated SOC (t C ha <sup>-1</sup> ) contents 1987-2010<br>Fixed root C calculations                | 25.71          | 31.48          | 31.54          | 31.60          | 31.44          |

59

60

61

62

63

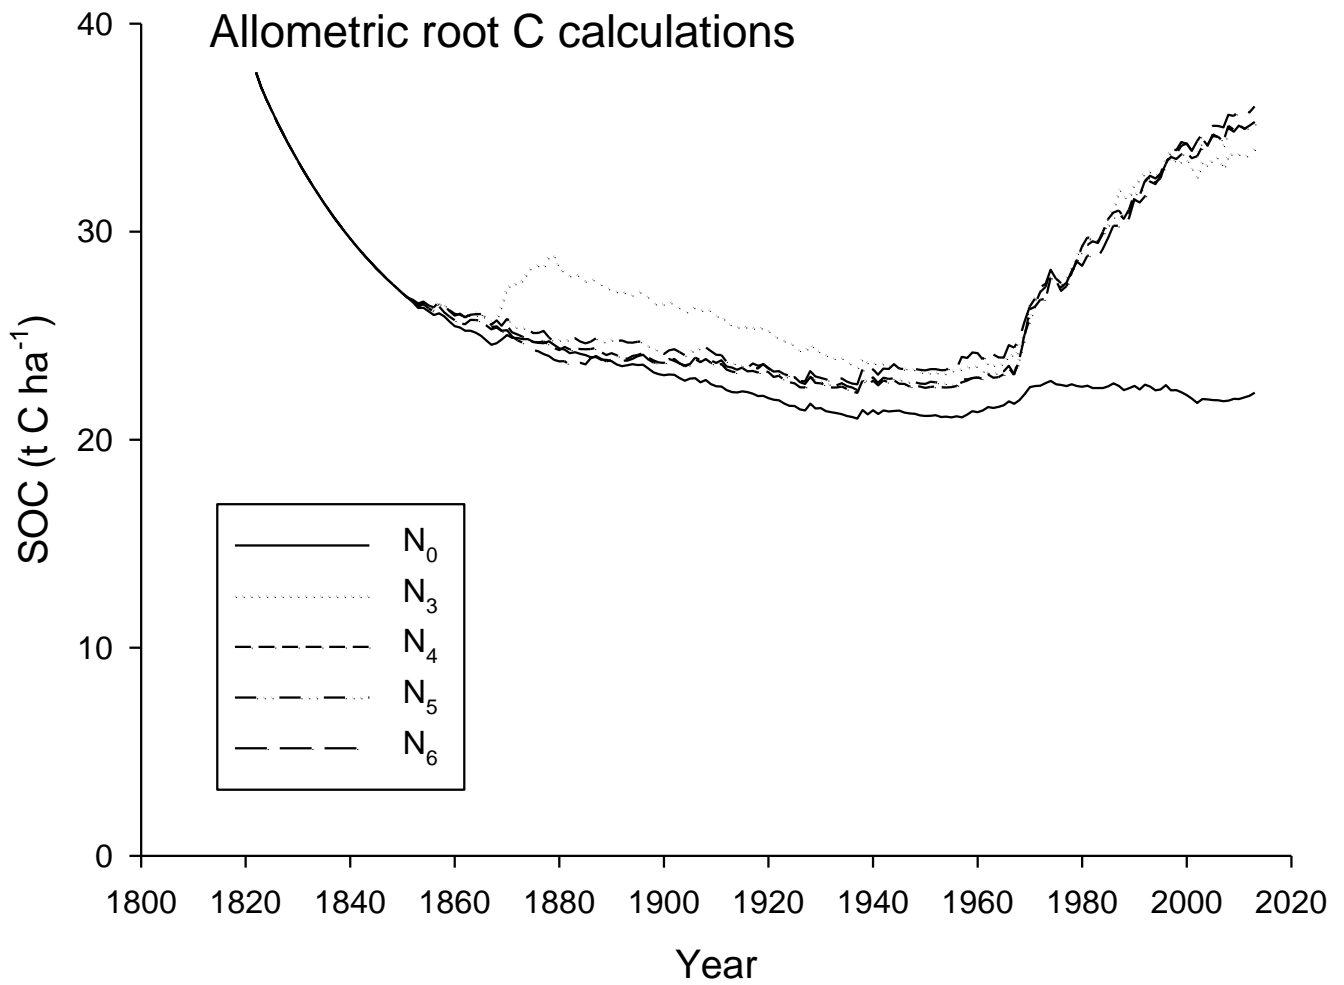

64  
65

66 **Figure S1.** Simulated soil organic carbon changes in 0 – 23 cm of the Broadbalk winter wheat  
67 experiment at Rothamsted, UK, allometric functions were used to calculate C input. See Table 1 for  
68 details of N treatments.

69

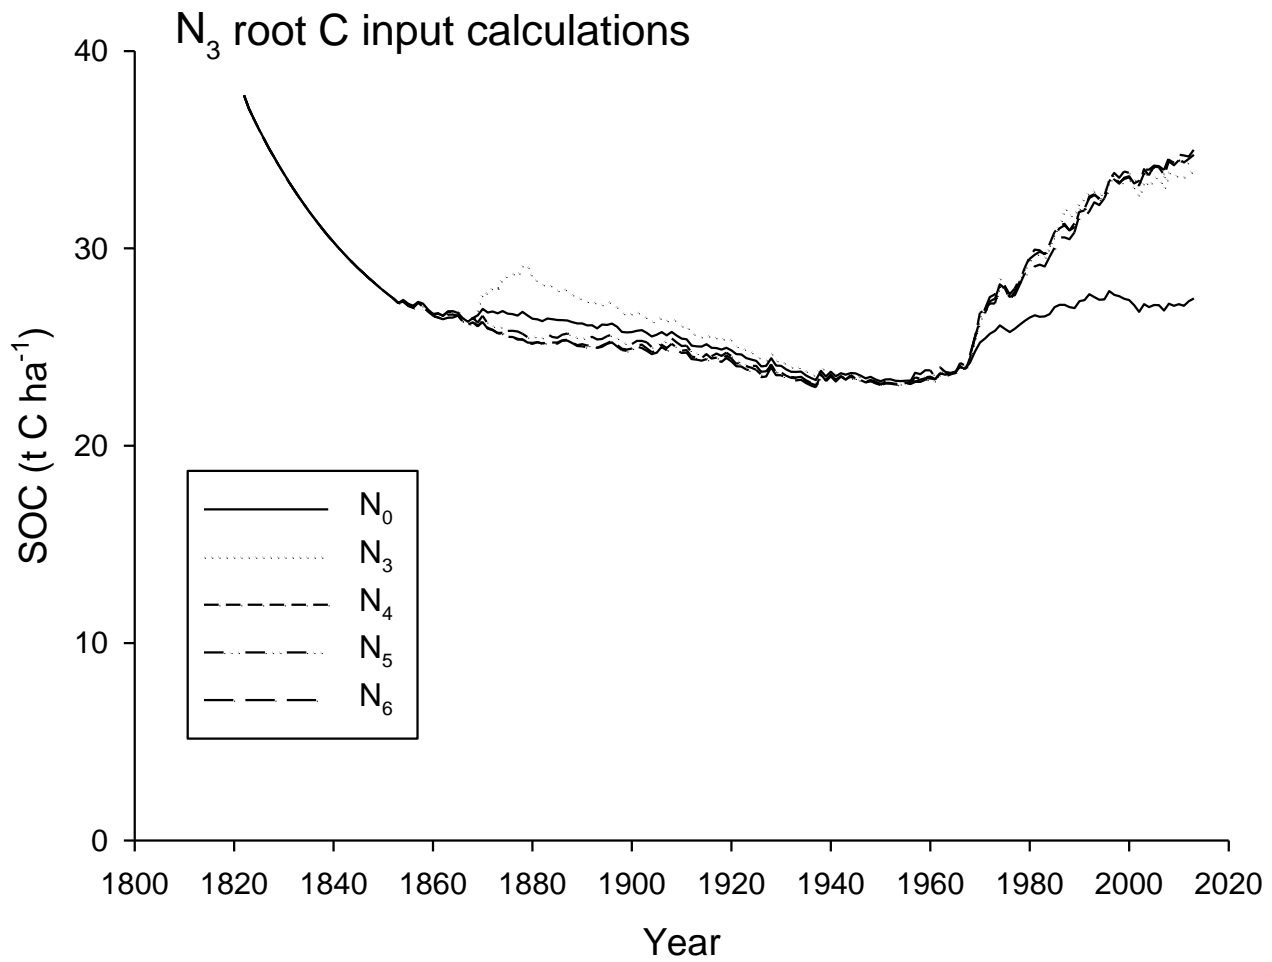

70  
 71 **Figure S2.** Simulated soil organic carbon changes in 0 – 23 cm of the Broadbalk winter wheat  
 72 experiment at Rothamsted, UK, N<sub>3</sub> root C input calculations were used. See Table 1 for details of N  
 73 treatments.

74

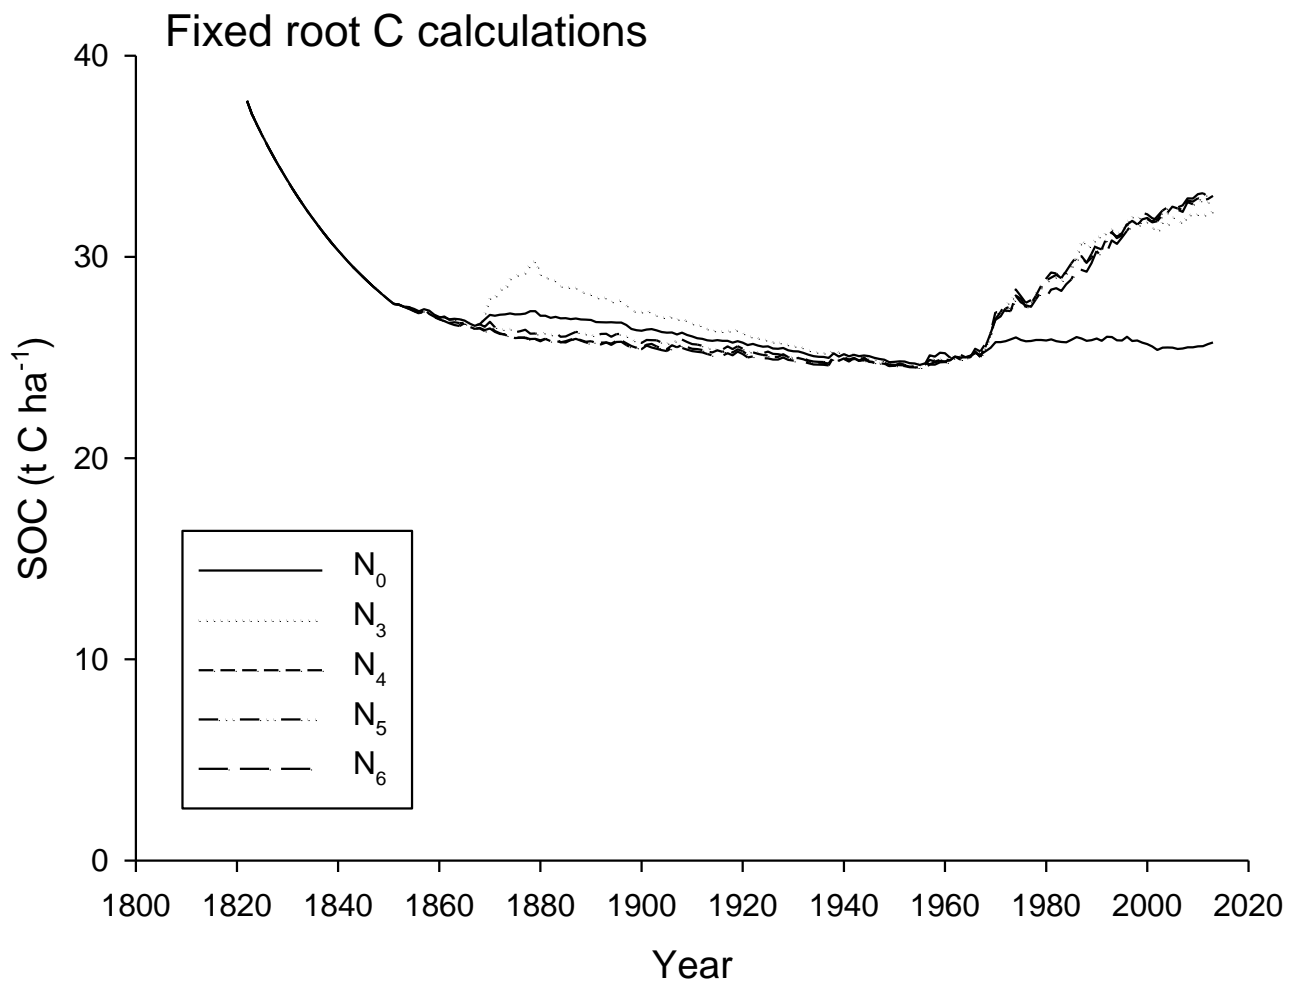

75

76 **Figure S3.** Simulated soil organic carbon changes in 0 – 23 cm of the Broadbalk winter wheat  
 77 experiment at Rothamsted, UK, fixed root C input calculations were used. See Table 1 for details of N  
 78 treatments.

79

80

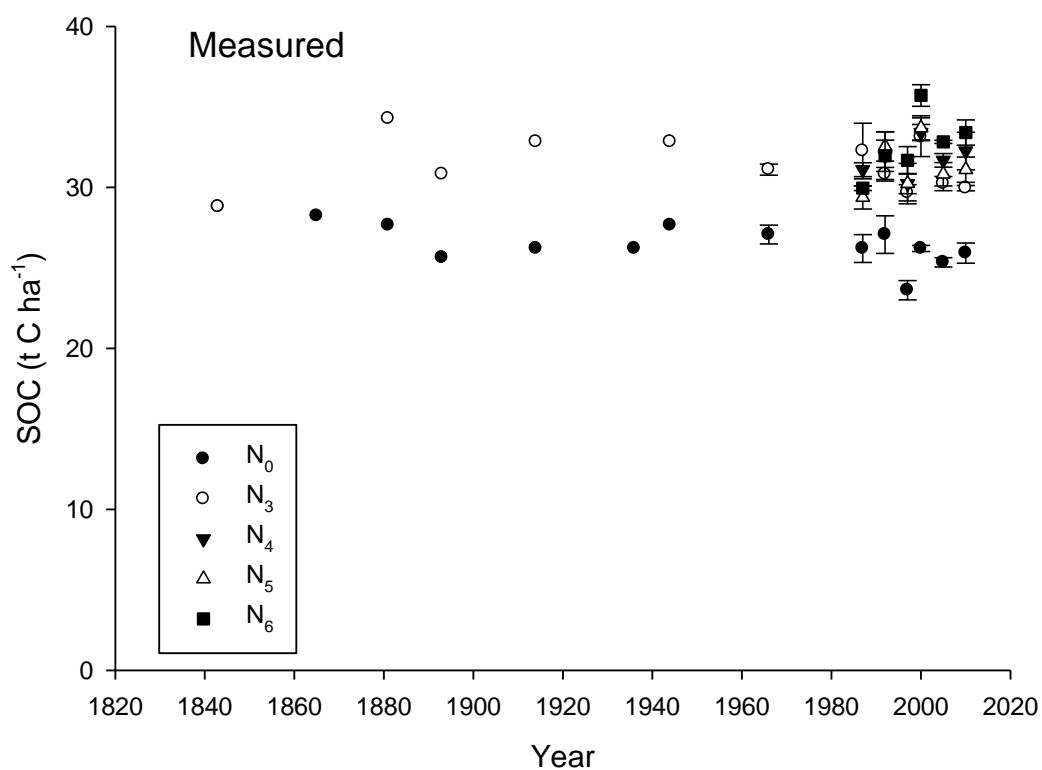

81

82 **Figure S4.** Measured soil organic carbon in 0 – 23 cm of the Broadbalk winter wheat experiment at  
 83 Rothamsted, UK. 1843 value estimated, 1865 values calculated from total soil % N and soil C:N in  
 84 1893. The other values calculated from % SOC and a standard soil weight of  $2.88 \times 10^6$  kg ha<sup>-1</sup>. Whole  
 85 experiment up to 1966, then continuous wheat sections (sections 1, 6 and 9) only (error bars =  $\pm$  s.e.m.,  
 86  $n = 2$  for year 1987 and  $n = 3$  for year 1992, 1997, 2000, 2005 and 2010). See Table 1 for details of N  
 87 treatments.

88
